# Supplementary material for: In vivo detection of tau fibrils and amyloid β aggregates with luminescent conjugated oligothiophenes and multiphoton microscopy
Source: PubMed Central journal article supplement (PMC6839235; doi:10.1186/s40478-019-0832-1), 2019-11-08

# Additional file 3: Figure S3

**A**

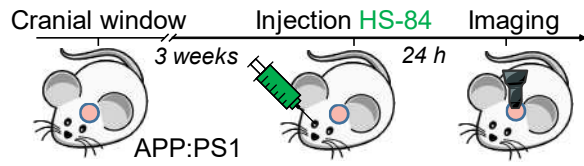

**B**

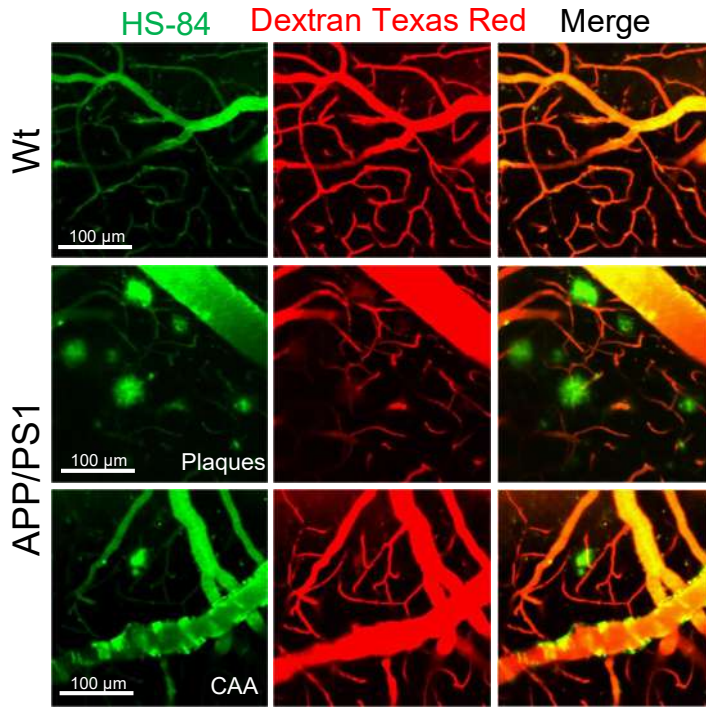

**C**

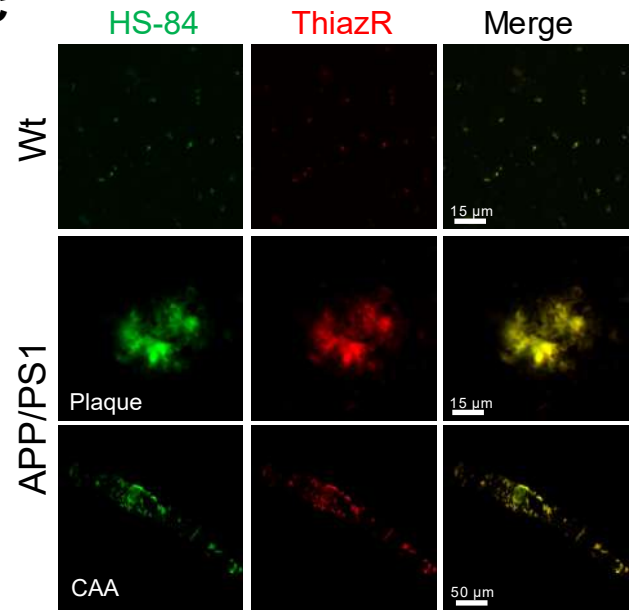

Supplement: 40478_2019_832_MOESM3_ESM.pdf [file 40478_2019_832_MOESM3_ESM.pdf]
