# Supplementary material for: In vivo detection of tau fibrils and amyloid β aggregates with luminescent conjugated oligothiophenes and multiphoton microscopy
Source: Springer Nature journal article supplement (doi:10.1186/s40478-019-0832-1), 2019-11-08

# Additional file 2: Figure S2

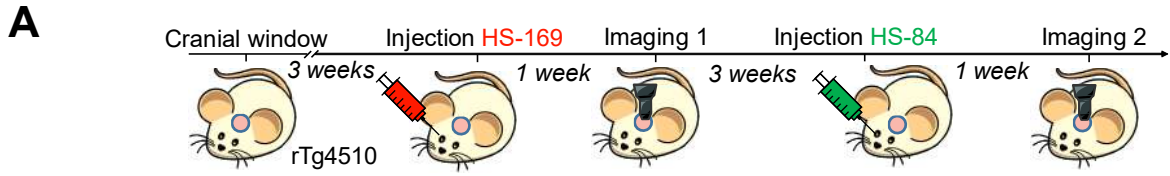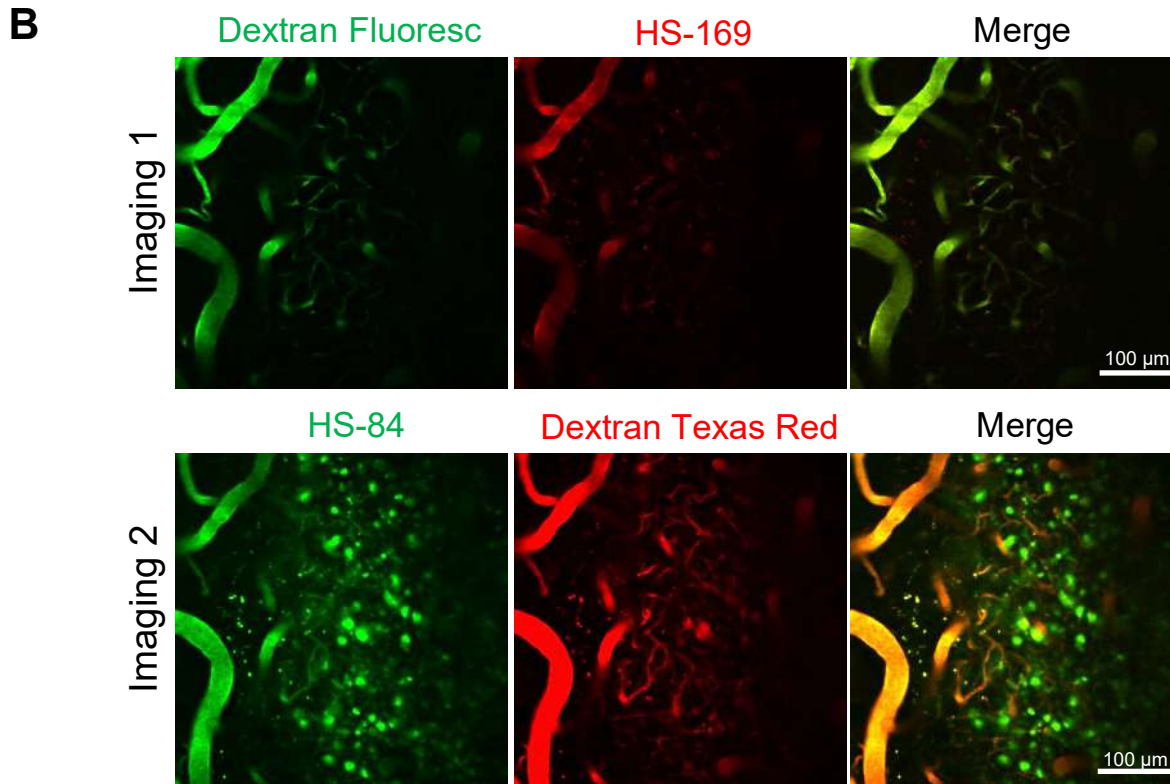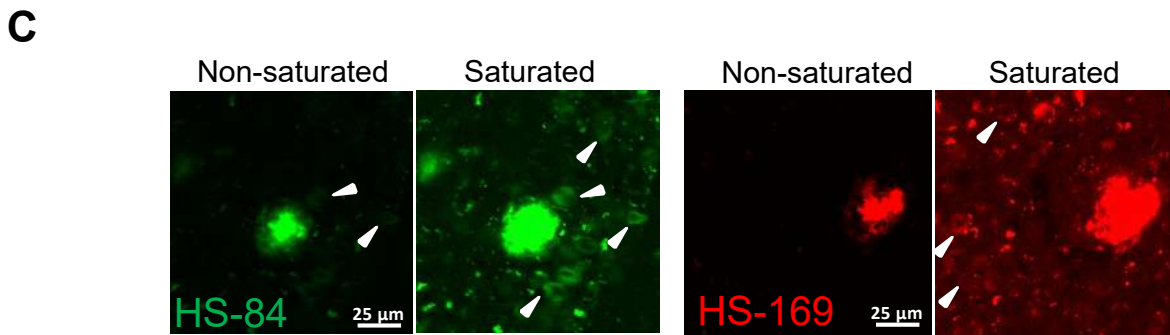

Supplement: MOESM2 [file 25666984]
